# Paternal influence of sperm DNA integrity on early embryonic development

L. Simon<sup>1</sup>, K. Murphy<sup>1</sup>, M.B. Shamsi<sup>1</sup>, L. Liu<sup>1</sup>, B. Emery<sup>1</sup>, K.I. Aston<sup>1</sup>, J. Hotaling<sup>1</sup>, and D.T. Carrell<sup>1,2,3,\*</sup>

<sup>1</sup>Andrology and IVF Laboratory, Department of Surgery (Urology), University of Utah, Salt Lake City, UT 84108, USA <sup>2</sup>Department of Obstetrics and Gynecology, University of Utah, Salt Lake City, UT 84108, USA <sup>3</sup>Department of Human Genetics, University of Utah, Salt Lake City, UT 84108, USA

\*Correspondence address. 675 Arapeen Drive, Suite 201, Salt Lake City, UT 84109, USA. Tel: +1-801-587-3772; Fax: +1-801-581-6127; E-mail: douglas.carrell@hsc.utah.edu

Submitted on May 20, 2014; resubmitted on July 8, 2014; accepted on July 18, 2014

**STUDY QUESTION:** Does sperm DNA damage affect early embryonic development?

**SUMMARY ANSWER:** Increased sperm DNA damage adversely affects embryo quality starting at Day 2 of early embryonic development and continuing after embryo transfer, resulting in reduced implantation rates and pregnancy outcomes.

**WHAT IS KNOWN ALREADY:** Abnormalities in the sperm DNA in the form of single and double strand breaks can be assessed by an alkaline Comet assay. Some prior studies have shown a strong paternal effect of sperm DNA damage on IVF outcome, including reduced fertilization, reduced embryo quality and cleavage rates, reduced numbers of embryos developing into blastocysts, increased percentage of embryos undergoing developmental arrest, and reduced implantation and pregnancy rates.

**STUDY DESIGN, SIZE, DURATION:** A cross-sectional study of 215 men from infertile couples undergoing assisted reproduction techniques at the University of Utah Center for Reproductive Medicine.

**PARTICIPANTS/MATERIALS, SETTING, METHODS:** Sperm from men undergoing ART were analyzed for DNA damage using an alkaline Comet assay and classified into three groups: 'low damage' (0–30%), 'intermediate damage' (31–70%) and 'high damage' (71–100%). The cause of couples' infertility was categorized into one of the three types (male, female or unexplained). Each embryo was categorized as 'good', 'fair' or 'poor' quality, based on the number and grade of blastomeres. The influence of sperm DNA damage on early embryonic development was observed and classified into four stages: peri-fertilization effect (fertilization rate), early paternal effect (embryonic days 1–2), late paternal effect (embryonic days 3–5) and implantation stage effect.

**MAIN RESULTS AND THE ROLE OF CHANCE:** The paternal effect of sperm DNA damage was observed at each stage of early embryonic development. The peri-fertilization effect was higher in oocytes from patients with female infertility (20.85%) compared with male (8.22%;  $P < 0.001$ ) and unexplained (7.30%;  $P < 0.001$ ) infertility factors. In both the early and late paternal effect stages, the low DNA damage group had a higher percentage of good quality embryos ( $P < 0.05$ ) and lower percentage of poor quality embryos ( $P < 0.05$ ) compared with the high DNA damage group. Implantation was lower in the high DNA damage (33.33%) compared with intermediate DNA damage (55.26%;  $P < 0.001$ ) and low DNA damage (65.00%;  $P < 0.001$ ) groups. The implantation rate was higher following blastocyst transfer (58.33%), when compared with early stage blastocyst (53.85%;  $P = 0.554$ ) and cavitating morula transfers (34.40%;  $P < 0.001$ ). Implantation was higher when the female partner age was  $\leq 35$  years when compared with  $> 35$  year age group (52.75 versus 35.44%;  $P = 0.008$ ).

**LIMITATIONS, REASONS FOR CAUTION:** A potential limitation of this study is that it is cross-sectional. Generally in such studies more than one variable could affect the outcome. Analyzing sperm is one part of the equation but a number of environmental and female factors also have the potential to influence embryo development and implantation. Furthermore, the selection of morphologically normal and physiologically motile sperm may result in isolation of sperm with reduced DNA damage. Therefore, selecting the best available sperm for ICSI may lead to experimental bias, as the selected sperm do not represent the overall sperm population in which the DNA damage is measured. Similar studies on selected sperm and with a larger sample size are now required.

**WIDER IMPLICATIONS OF THE FINDINGS:** The paternal influence of damaged chromatin is more prominent after zygotic transcriptional activation. A prolonged paternal effect on the developing embryo may be due to the active repair mechanism present in oocytes that tends to overcome the damaged paternal chromatin. The probability of eliminating an embryo fertilized by a sperm with damaged DNA is higher at the blastocyst stage than the cleavage stage; therefore blastocyst transfer could be recommended for better implantation success. Finally, we recommend ICSI treatment for patients with a higher percentage of sperm with DNA damage as well as additional studies with a larger sample size aimed at assessing DNA damage analysis as a diagnostic tool for IVF.

**STUDY FUNDING/COMPETING INTEREST(S):** This work was supported by the University of Utah internal funds. The authors declare no competing interests.

**TRIAL REGISTRATION NUMBER:** N/A.

**Key words:** assisted reproduction techniques / Comet assay / embryo quality / implantation rate / sperm DNA damage

## Introduction

Assisted reproduction techniques (ART) have created the possibility of treating the majority of infertile couples; however, <50% of treatment cycles result in a pregnancy. Gametes and embryo quality are a major determinant of ART success (Scott, 2003; Terriou *et al.*, 2007; Ajduk and Zernicka-Goetz, 2013). It is well established that high-quality gametes are required to produce high-quality embryos, and that both the sperm and oocyte genomes contribute to the embryonic genome (Marteil *et al.*, 2009).

A number of studies have shown that abnormalities in the paternal DNA adversely impact embryo quality (Virro *et al.*, 2004; Benchaib *et al.*, 2007; Simon *et al.*, 2010), while poor sperm quality is also associated with delayed pronuclear formation and sluggish embryonic development (Ron-El *et al.*, 1991). In addition, Parinaud *et al.* (1993) showed an association between abnormal sperm morphology and poor embryo morphology suggesting that sperm is involved in embryonic quality and development. Such a finding in morphologically abnormal sperm is likely to be related to reduced sperm DNA integrity. Multiple studies have associated sperm DNA damage with abnormal sperm concentration (Nijs *et al.*, 2009), progressive motility, normal morphology (Tavalaee *et al.*, 2009), sperm viability (Ozmen *et al.*, 2007) and sperm maturity (Virro *et al.*, 2004). Lastly, recent studies have highlighted the role of epigenetic factors in embryogenesis (Carrell, 2012).

There is much debate in the literature as to whether early embryo development is influenced exclusively by the maternal factors (Braude *et al.*, 1988) or whether there are also paternal controls at this early stage (Tesarik *et al.*, 2004; Baltaci *et al.*, 2006). It is well documented that the first two embryonic cell divisions are primarily controlled by the maternal genes (Braude *et al.*, 1988) and paternal effects commence at the 4-cell stage. Further, the detrimental effects of sperm DNA damage are more prominent during the later stages of embryo development (Dar *et al.*, 2013). The described paternal effects on pre- and post-implantation embryos include slower embryo cleavage, poor morphology, lower blastocyst formation and lower implantation rates (Parinaud *et al.*, 1993; Janny and Menezo, 1994). However, major discrepancies exist within the published data regarding the developmental timing and the extent of paternal effects on embryo quality.

IVF is a uniquely useful tool to compare the impact of male and female gametes on early embryo development, as the quality of sperm and oocyte, and embryo quality can be measured directly within in the clinical setting. To our knowledge, this is the first study to comprehensively

evaluate the effect of sperm DNA damage on embryonic development and implantation in patient groups stratified by male, female and unexplained infertility factors. We assessed the influence of sperm DNA damage on embryo quality at several embryonic developmental stages, as described by Tesarik *et al.* (2004): (i) peri-fertilization effect—where oocytes fail to form a pronucleus following ICSI insemination, (ii) early paternal effect—embryo development until 4-cell stage prior to paternal genome activation, (iii) late paternal effect—embryo development from Day 2 to Day 5, during which time the paternal genome is known to contribute to embryo development and (iv) implantation stage effect—the percentage of blastocysts implanted in the uterus following Day 5 blastocyst transfer.

## Materials and Methods

### Subjects

Men presenting at the University of Utah IVF Andrology laboratory for ART between April 2011 and April 2013 were invited to participate in this study ( $n = 215$ ). All subjects gave written informed consent for participation in this study, and the University of Utah Institutional Review Board approved the project. Semen samples were obtained after a recommended 2–5 days of sexual abstinence. All samples were subjected to a conventional light microscopic semen analysis to determine liquefaction, semen volume, sperm concentration, total sperm count and motility according to World Health Organization (WHO) recommendations (WHO, 1999).

### ART procedures

Ovarian stimulation was performed using standard techniques. Oocytes were obtained using ultrasound-guided, transvaginal aspiration. Standard IVF involved insemination of metaphase II oocytes with 100 000–200 000 progressively motile sperm in a 100  $\mu$ l drop of human tubal fluid medium. ICSI was performed using microtool sperm immobilization and injection. Resulting embryos were cultured for 3–5 days after oocyte retrieval in human tubal fluid medium, and then transferred to the uterus. All embryos were included in the determination of the patient's mean embryo score (Carrell *et al.*, 1999). Implantation was confirmed by fetal heartbeat 6 weeks after embryo transfer.

### Alkaline Comet assay

Sperm DNA damage was assessed in the native semen using an alkaline single-cell gel electrophoresis (Comet) assay as modified previously by Hughes *et al.* (1997) and Donnelly *et al.* (1999). Sperm was considered

damaged or normal based on the presence or absence of a visible comet tail, respectively. Fifty to 100 Comets were scored per sample.

## Blastocyst inclusion criteria for analysis

To identify blastocysts that successfully implanted following Day 5 transfers, the inclusion criteria required: (i) transfer of a single blastocyst, or (ii) more than one blastocyst was transferred but all transferred blastocysts were of the same stage and grade, or (iii) multiple blastocysts types were transferred but all or none of the blastocysts implanted.

## Statistical analysis

Data were analyzed using the Statistical Package for the Social Sciences (SPSS 18) for Windows (SPSS, Inc., Chicago, IL, USA). Sperm DNA damage was categorized into three groups: 'low damage' (0–30% damaged sperm), 'intermediate damage' (31–70% damaged sperm) and 'high damage' (71–100% damaged sperm). Embryo quality was scored on degree of cellular fragmentation and regularity of blastomere morphology. The study subjects were categorized into three groups based on the type of infertility (male, female and unexplained) determined by the physicians and based on the history of the patients. Patients were stratified based on the type of treatment (IVF or ICSI) separately and combined, and the age of female partners ( $\leq 35$  or  $> 35$  years). Each embryo was categorized into 'good', 'fair' or 'poor' quality embryo type, based on their blastomere number and grade (Carrell et al., 1999). The chi-square statistic was used to test the paternal effect of sperm DNA damage between the patient infertility categories, type of insemination, embryo quality and level of DNA damage. Logistic regression was performed to determine the impact of sperm DNA damage and infertility factors simultaneously to predict the quality of developing embryos, implantation and or pregnancy success. Statistical power and sample size were calculated using the software SAS/STAT 9.22.

## Results

Fertilization was achieved by standard IVF ( $n = 81$ ), ICSI ( $n = 115$ ), or a combination of both standard IVF and ICSI ( $n = 19$ ). A total of 1259 oocytes were fertilized using ICSI and 951 oocytes were fertilized by IVF. The percentage of patients under each infertility type for IVF was male (27.4%), female (39.0%) and unexplained (33.6%), while for ICSI was male (28.9%), female (34.6%) and unexplained (36.5%).

### Peri-fertilization effect

In order to eliminate variability in sperm penetration ability and fertilization timing, only ICSI cases were included in an analysis of pre-fertilization paternal effects of DNA damage. Of the 1409 oocytes inseminated by ICSI, 150 (10.65%) oocytes failed to perform normal pronuclear formation, resulting in 1259 fertilized embryos. When the cases were categorized into three infertility groups, couples with female factor infertility had a higher percentage of peri-fertilization defect (69 of 331 = 20.85%) when compared with couples with male (32 of 389 = 8.22%;  $P < 0.001$ ), and unexplained (49 of 671 = 7.30%;  $P < 0.001$ ) infertility issues. When each infertility category was categorized into high, intermediate or low levels of sperm DNA damage, the peri-fertilization defect was positively associated with sperm DNA damage in the male infertility group, but the observed difference was not statistically significant (Fig. 1).

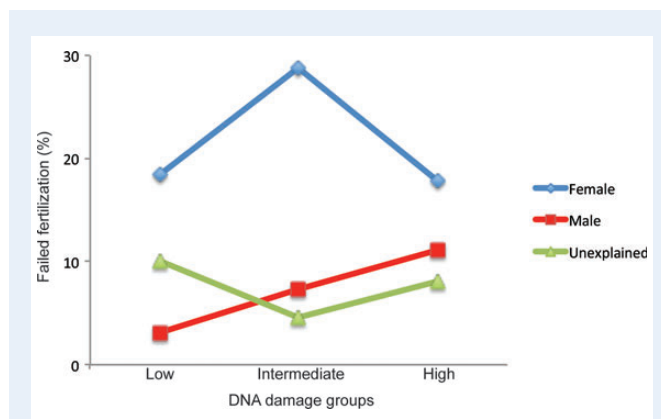

**Figure 1** Differences in the percentage of human oocytes that failed to fertilize after ICSI, in the three DNA damage groups.

### Early paternal effect

Early paternal effect was assessed on Day 2 of embryo development (4-cell stage) when the paternal genome is considered to be inactive. When both of the insemination groups were combined ( $n = 2210$  embryos), there was a decrease ( $P < 0.001$ ) in the percentage of good quality embryos and an increase ( $P = 0.002$ ) in the percentage of poor quality embryos with increasing sperm DNA damage category. Likewise, when embryos were classified based on their infertility type [male ( $n = 546$ ), female ( $n = 898$ ) and unexplained ( $n = 766$ )], there was a decrease in the percentage of good quality embryos in the female ( $P = 0.008$ ) and unexplained ( $P = 0.033$ ) infertility groups and an increase in the poor quality embryos in the female ( $P = 0.005$ ) and unexplained ( $P = 0.002$ ) infertility group associated with increased sperm DNA damage (Tables I and II).

### Late paternal effect

Late paternal effect was assessed on Day 3 cleavage stage embryos ( $n = 2210$ ) and Day 5 blastocyst stage embryos ( $n = 2019$ ), when the paternal genome is known to be actively involved in embryo development. Day 3 cleavage stage embryo transfer was performed in 33 patients. On Day 3 of culture, there was a decrease in the percentage of good quality embryos ( $P = 0.006$ ) and an increase in the percentage of poor ( $P = 0.002$ ) quality embryos with increasing sperm DNA damage (Table II). When all of the embryos on Day 3 were classified based on their infertility types, there was a significant decrease in the percentage of good quality embryos in the female ( $P = 0.021$ ) and unexplained ( $P = 0.002$ ) infertility groups and a significant increase in the poor quality embryos in the female ( $P = 0.021$ ) and unexplained ( $P < 0.001$ ) infertility group, with increase in sperm DNA damage. In couples with male infertility, there was an increase in the percentage of good quality embryos ( $P = 0.013$ ) and a decrease in the fair quality embryos ( $P < 0.001$ ) with increasing sperm DNA damage (Table I).

On Day 5, there was a decrease in the percentage of good quality embryos ( $P = 0.014$ ) and an increase in the percentage of poor ( $P = 0.001$ ) quality embryos with increase in sperm DNA damage (Table II). When all of the embryos on Day 5 were classified based on their infertility types, there was a significant decrease in the percentage of good quality embryos in the female ( $P = 0.016$ ) infertility group and a significant increase in the poor quality embryos in the female

**Table 1** Correlation between sperm DNA damage, determined by the Comet assay, and embryo quality in couples with different types of infertility.

|                                          | Unexplained factor infertility |                    |            |         | Female factor infertility |                    |            |         | Male factor infertility |                    |            |         |
|------------------------------------------|--------------------------------|--------------------|------------|---------|---------------------------|--------------------|------------|---------|-------------------------|--------------------|------------|---------|
| Embryo quality on Day 2 [percentage (n)] |                                |                    |            |         |                           |                    |            |         |                         |                    |            |         |
| DNA damage (n)                           | Low (112)                      | Intermediate (229) | High (425) | P-value | Low (149)                 | Intermediate (342) | High (407) | P-value | Low (74)                | Intermediate (267) | High (205) | P-value |
| Good                                     | 45.5 (51)                      | 51.5 (118)         | 40.9 (174) | 0.003   | 50.3 (75)                 | 46.8 (160)         | 37.8 (154) | 0.008   | 48.7 (36)               | 56.9 (152)         | 54.6 (112) | 0.445   |
| Fair                                     | 33.9 (38)                      | 33.6 (77)          | 32.5 (138) | 0.933   | 30.9 (46)                 | 23.4 (80)          | 29.3 (119) | 0.112   | 27.0 (20)               | 22.9 (61)          | 22.5 (46)  | 0.707   |
| Poor                                     | 20.6 (23)                      | 14.9 (34)          | 26.6 (113) | 0.002   | 18.8 (28)                 | 29.8 (102)         | 32.9 (134) | 0.005   | 24.3 (18)               | 20.2 (54)          | 22.9 (47)  | 0.664   |
| Embryo quality on Day 3                  |                                |                    |            |         |                           |                    |            |         |                         |                    |            |         |
| DNA damage (n)                           | Low (112)                      | Intermediate (229) | High (425) | P-value | Low (149)                 | Intermediate (342) | High (407) | P-value | Low (74)                | Intermediate (267) | High (205) | P-value |
| Good                                     | 52.7 (59)                      | 48.9 (112)         | 37.6 (160) | 0.002   | 48.3 (72)                 | 40.9 (140)         | 35.6 (145) | 0.021   | 33.8 (25)               | 51.7 (138)         | 52.7 (108) | 0.013   |
| Fair                                     | 15.2 (17)                      | 25.8 (59)          | 15.8 (67)  | 0.004   | 15.5 (23)                 | 14.1 (48)          | 15.0 (61)  | 0.899   | 33.8 (25)               | 13.9 (37)          | 17.6 (36)  | <0.001  |
| Poor                                     | 32.1 (36)                      | 25.3 (58)          | 46.6 (198) | <0.001  | 36.2 (54)                 | 45.0 (154)         | 49.4 (201) | 0.021   | 32.4 (24)               | 34.4 (92)          | 29.7 (61)  | 0.557   |
| Embryo quality on Day 5                  |                                |                    |            |         |                           |                    |            |         |                         |                    |            |         |
| DNA damage (n)                           | Low (112)                      | Intermediate (212) | High (402) | P-value | Low (139)                 | Intermediate (315) | High (337) | P-value | Low (70)                | Intermediate (246) | High (186) | P-value |
| Good                                     | 11.6 (13)                      | 13.2 (28)          | 9.2 (37)   | 0.297   | 16.6 (23)                 | 11.4 (36)          | 7.7 (26)   | 0.016   | 4.3 (3)                 | 15.5 (38)          | 10.2 (19)  | 0.026*  |
| Fair                                     | 28.6 (32)                      | 26.9 (71)          | 26.9 (108) | 0.226   | 30.9 (43)                 | 28.3 (89)          | 24.3 (82)  | 0.278   | 37.1 (26)               | 30.9 (76)          | 30.1 (56)  | 0.537   |
| Poor                                     | 59.8 (67)                      | 63.9 (113)         | 63.9 (257) | 0.037   | 42.5 (73)                 | 60.3 (190)         | 68.0 (229) | 0.004   | 58.6 (41)               | 53.6 (132)         | 59.7 (111) | 0.428   |

Rows are % (n) values for embryo quality observed on Days 2, 3 and 5. The chi-square statistic was used to calculate P-values (shaded columns). The P-values compare the quality of embryos between the categories of sperm DNA damage.

\*Although statistically significant, the small sample size in the good quality embryo/male infertility subgroup is underpowered to ascertain whether a statistically significant difference truly exists.

**Table II Comparison of embryo quality between the DNA damage groups and insemination methods.**

|                                                                               | ICSI insemination |              |              |          | IVF insemination |             |             |          | Combining ICSI + IVF |              |              |          |
|-------------------------------------------------------------------------------|-------------------|--------------|--------------|----------|------------------|-------------|-------------|----------|----------------------|--------------|--------------|----------|
| Combining low, intermediate and high DNA damage groups [percentage (n)]       |                   |              |              |          |                  |             |             |          |                      |              |              |          |
|                                                                               | Day 2 (1259)      | Day 3 (1259) | Day 5 (1142) | *P-value | Day 2 (951)      | Day 3 (951) | Day 5 (877) | *P-value | Day 2 (2210)         | Day 3 (2210) | Day 5 (2019) | *P-value |
| Good                                                                          | 51.3 (646)        | 48.2 (607)   | 12.2 (139)   | <0.001   | 40.6 (386)       | 37.0 (352)  | 9.6 (84)    | <0.001   | 46.7 (1032)          | 43.4 (959)   | 11.0 (223)   | <0.001   |
| Fair                                                                          | 30.4 (383)        | 17.6 (222)   | 33.3 (380)   | <0.001   | 25.4 (242)       | 15.9 (151)  | 23.1 (203)  | <0.001   | 28.3 (625)           | 16.9 (373)   | 28.9 (583)   | <0.001   |
| Poor                                                                          | 18.3 (230)        | 34.2 (430)   | 54.5 (623)   | <0.001   | 34.0 (323)       | 47.1 (448)  | 67.3 (590)  | <0.001   | 25.0 (553)           | 39.7 (878)   | 60.1 (1213)  | <0.001   |
| In the low DNA damage group                                                   |                   |              |              |          |                  |             |             |          |                      |              |              |          |
|                                                                               | Day 2 (196)       | Day 3 (196)  | Day 5 (196)  | *P-value | Day 2 (139)      | Day 3 (139) | Day 5 (125) | *P-value | Day 2 (335)          | Day 3 (335)  | Day 5 (321)  | *P-value |
| Good                                                                          | 49.0 (96)         | 50.5 (99)    | 12.8 (25)    | <0.001   | 47.5 (66)        | 41.0 (57)   | 11.2 (14)   | <0.001   | 48.4 (162)           | 46.6 (156)   | 12.2 (39)    | <0.001   |
| Fair                                                                          | 36.2 (71)         | 19.9 (39)    | 39.8 (78)    | <0.001   | 23.7 (33)        | 18.7 (26)   | 18.4 (23)   | 0.469    | 31.0 (104)           | 19.4 (65)    | 31.5 (101)   | <0.001   |
| Poor                                                                          | 14.8 (29)         | 29.6 (58)    | 47.4 (93)    | <0.001   | 28.8 (40)        | 40.3 (56)   | 70.4 (88)   | <0.001   | 20.6 (69)            | 34.0 (114)   | 56.3 (181)   | <0.001   |
| In the intermediate DNA damage group                                          |                   |              |              |          |                  |             |             |          |                      |              |              |          |
|                                                                               | Day 2 (472)       | Day 3 (472)  | Day 5 (427)  | *P-value | Day 2 (366)      | Day 3 (366) | Day 5 (346) | *P-value | Day 2 (838)          | Day 3 (838)  | Day 5 (773)  | *P-value |
| Good                                                                          | 59.1 (279)        | 55.5 (262)   | 15.2 (65)    | <0.001   | 41.3 (151)       | 35.0 (128)  | 10.7 (37)   | <0.001   | 51.3 (430)           | 46.5 (390)   | 13.2 (102)   | <0.001   |
| Fair                                                                          | 26.9 (127)        | 18.4 (87)    | 36.3 (155)   | <0.001   | 24.9 (91)        | 15.6 (57)   | 23.4 (81)   | 0.004    | 26.0 (218)           | 17.2 (144)   | 30.5 (236)   | <0.001   |
| Poor                                                                          | 14.0 (66)         | 26.1 (123)   | 48.5 (207)   | <0.001   | 33.8 (124)       | 49.4 (181)  | 65.9 (228)  | <0.001   | 22.7 (190)           | 36.3 (304)   | 56.3 (435)   | <0.001   |
| In the high DNA damage group                                                  |                   |              |              |          |                  |             |             |          |                      |              |              |          |
|                                                                               | Day 2 (591)       | Day 3 (591)  | Day 5 (519)  | *P-value | Day 2 (446)      | Day 3 (446) | Day 5 (406) | *P-value | Day 2 (1037)         | Day 3 (1037) | Day 5 (925)  | *P-value |
| Good                                                                          | 45.9 (271)        | 41.6 (246)   | 9.4 (49)     | <0.001   | 37.9 (169)       | 37.4 (167)  | 8.1 (33)    | <0.001   | 42.4 (440)           | 39.8 (413)   | 8.9 (82)     | <0.001   |
| Fair                                                                          | 31.3 (185)        | 16.2 (96)    | 28.3 (147)   | <0.001   | 26.5 (118)       | 15.3 (68)   | 24.4 (99)   | <0.001   | 29.2 (303)           | 15.8 (164)   | 26.6 (246)   | <0.001   |
| Poor                                                                          | 22.8 (135)        | 42.1 (249)   | 62.3 (323)   | <0.001   | 35.6 (159)       | 47.3 (211)  | 67.5 (274)  | <0.001   | 28.4 (294)           | 44.4 (460)   | 64.5 (597)   | <0.001   |
| **P-values comparing embryos between low DNA damage and high DNA damage group |                   |              |              |          |                  |             |             |          |                      |              |              |          |
| Good                                                                          | 0.447             | 0.029        | 0.194        | –        | 0.044            | 0.450       | 0.290       | –        | 0.057                | 0.029        | 0.086        | –        |
| Fair                                                                          | 0.202             | 0.239        | 0.003        | –        | 0.522            | 0.332       | 0.164       | –        | 0.424                | 0.125        | 0.093        | –        |
| Poor                                                                          | 0.016             | 0.001        | <0.001       | –        | 0.135            | 0.146       | 0.541       | –        | 0.005                | <0.001       | 0.009        | –        |

Rows are % (n) values for embryo quality observed on Days 2, 3 and 5, categorized into the levels of sperm DNA damage. The chi-square statistic was used to calculate P-values (shaded columns).

\*P-values compare the quality of embryos between different time points of development—Days 2, 3 and 5 (shaded columns).

\*\*P-values compare the quality of embryos (Good, Fair or Poor) between the low DNA damage and high DNA damage categories at each time point—Days 2, 3 and 5 (shaded rows).



( $P = 0.004$ ) and unexplained ( $P = 0.037$ ) infertility group, with increasing sperm DNA damage. In contrast to this, couples with male infertility type had a significantly higher percentage of good quality embryos ( $P = 0.026$ ) with increased sperm DNA damage (Table I).

## Comparison of embryo quality between IVF and ICSI insemination

The total number of embryos analyzed in this study on Day 2 and 3 was [IVF ( $n = 951$ ) and ICSI ( $n = 1259$ )] and on Day 5 was [IVF ( $n = 877$ ) and ICSI (1142)]. The percentage of poor quality embryos was significantly lower and the percentage of good quality embryos was significantly higher after ICSI insemination method compared with microdrop insemination (Table II). In addition, when compared between the DNA damage groups, the quality of embryos was statistically different between IVF and ICSI insemination (Table III). Following ICSI insemination, there was a significant decrease in the percentage of good quality embryos and an increase in the percentage of poor quality embryos with increasing sperm DNA damage. However, no such correlations were observed after IVF insemination.

## Progression of embryo development

In ICSI, IVF or both insemination types combined, we observe an increase in the percentage of poor quality embryos and a decrease in the percentage of good quality embryos from Day 2 to Day 5 (Table II). In order to more precisely evaluate the effect of sperm DNA damage on the developing embryo over time, we sought to track the progression of individual embryos from Day 2 through Day 5. For this analysis, the number of embryos in some groups was not sufficient to generate statistical power when IVF and ICSI were considered separately, due to lack of power. Supplementary Tables SI–SIV are included, with stratification by IVF or ICSI, but any statistically significant values with sample sizes  $< 40$  in each group are underpowered to detect any difference  $< 10\%$ . Therefore, we combined IVF and ICSI insemination types and compared the percentage of good, fair and poor quality embryos between low DNA damage and high DNA damage groups as they progressed from Day 2 to Day 3 (Fig. 2), and from Day

3 to Day 5 (Fig. 3). Although we see a trend, the progression of embryo development is not statistically different between the DNA damage groups from Day 2 to Day 3 ( $P > 0.05$ ; Fig. 2). However, a significant difference is seen between the DNA damage groups when the embryo progression was analyzed from Day 3 to Day 5 (Fig. 3).

## Implantation stage

An implantation rate of 49.58% was observed following transfer of 355 blastocysts in 182 patients (excluding patients with Day 3 embryo transfers). The implantation rate was lower in the high DNA damage group compared with intermediate ( $P < 0.001$ ) and low DNA damage groups ( $P < 0.001$ ; Table IV). Implantation was higher when the female partner age was  $\leq 35$  years when compared with  $> 35$  age group (52.75 versus 35.44%;  $P = 0.008$ ). The high DNA damage group had a lower implantation rate when the female partner age was  $> 35$  years when compared with  $\leq 35$  years age group ( $P < 0.001$ ). However, no difference in implantation rate was observed between the age groups in the low ( $P = 0.136$ ) and intermediate ( $P = 0.631$ ) DNA damage categories (Table IV). Couples with unexplained infertility had a lower implantation rate (32.7%) when compared with couples having female (54.0%;  $P = 0.001$ ) and male (60.0%;  $P < 0.001$ ) infertility.

To be able to track the individual blastocyst that successfully implanted following Day 5 transfers, a blastocyst inclusion criterion was followed as described above. A total of 297 blastocysts were included from 151 patients having an implantation rate of 48.15% (143/297). Predominantly, four grades of embryos were transferred in the study: grade 2 blastocyst (B2, 48.48%), grade 2 early blastocyst (EB2, 8.42%), grade 2 cavitating morula (M2cav, 35.02%), grade 2 morula (M2, 5.05%) and others (3.03%). The number of M2 and other (B1, B3, EB3, M3Cav and M3) grade blastocysts was too low for any statistical analysis and hence they were not included in the following statistics. B2 grade blastocysts resulted in 58.33% implantation, EB2 grade blastocysts resulted in 52.00% implantation and M2Cav stage blastocysts resulted in 35.58% implantation. When the implantation rate of each embryonic stage and grade was analyzed between the three DNA damage groups, all three blastocyst types showed higher implantation rate in the low DNA damage group when compared with intermediate and high DNA damage groups (Fig. 4).

## Pregnancy outcome

Clinical pregnancies were lower in the high DNA damage group (44.8%) when compared with low DNA damage (69.7%;  $P = 0.013$ ) and intermediate DNA damage (68.6%;  $P < 0.001$ ) groups. Couples with unexplained infertility had lower clinical pregnancy rates (48.4%) compared with couples with female (60.2%;  $P = 0.137$ ) and male (70.9%;  $P = 0.013$ ) infertility. ICSI had a higher pregnancy rate (60.7%; 82/135) compared with the IVF (52.5%; 42/80) insemination method ( $P = 0.237$ ). There was a statistically significant difference between IVF and ICSI pregnancies in the low DNA damage group (54.6 versus 88.2%;  $P = 0.044$ ). However, no statistical significance difference was observed in the clinical pregnancies between IVF and ICSI insemination methods in the intermediate (72.7 versus 62.9%;  $P = 0.335$ ) and high (33.3 versus 50.0%;  $P = 0.116$ ) DNA damage groups. Our results for obtaining a successful clinical pregnancy are also supported by the receiver operating curve analysis, as the area under the curve is 0.672  $\text{cm}^2$  ( $P = 0.008$ ) for IVF insemination and 0.697  $\text{cm}^2$  ( $P < 0.001$ ) for ICSI insemination method.

**Table III** P-values comparing embryo quality between IVF and ICSI insemination methods in the three DNA damage groups.

|                         |      | Low       | Intermediate | High      |
|-------------------------|------|-----------|--------------|-----------|
| Embryo quality on Day 2 | Good | 0.786     | $< 0.001$    | 0.010     |
|                         | Fair | 0.793     | 0.503        | 0.089     |
|                         | Poor | 0.002     | $< 0.001$    | $< 0.001$ |
| Embryo quality on Day 3 | Good | 0.085     | $< 0.001$    | 0.173     |
|                         | Fair | 0.785     | 0.276        | 0.663     |
|                         | Poor | 0.041     | $< 0.001$    | 0.096     |
| Embryo quality on Day 5 | Good | 0.677     | 0.001        | 0.485     |
|                         | Fair | $< 0.001$ | $< 0.001$    | 0.178     |
|                         | Poor | $< 0.001$ | $< 0.001$    | 0.097     |

The percentage of good, fair and poor quality embryos used for the comparison between the IVF and ICSI insemination methods are presented in Table II. The chi-square statistic was used to calculate the P-value, between the two types of insemination.

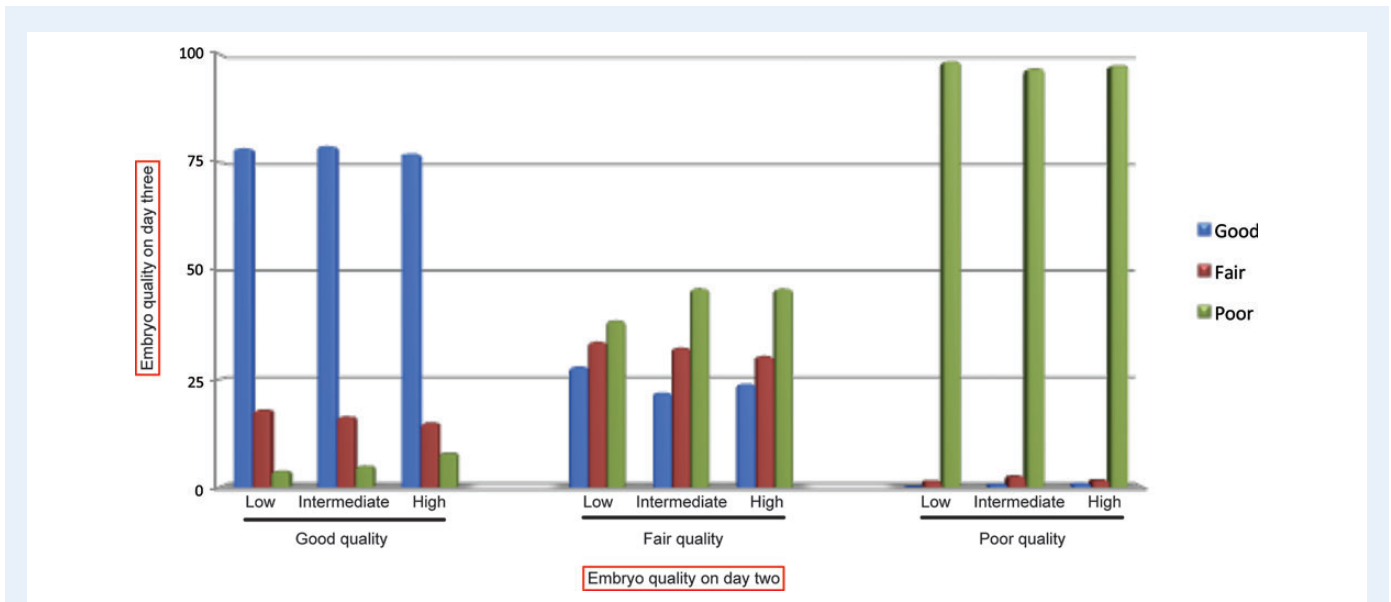

**Figure 2** Progression of human embryo development from Day 2 to Day 3 stratified by DNA damage levels (low, intermediate and high). Values expressed as percentage of embryo quality on Day 3 in each strata of DNA damage. Results are stratified by Good, Fair and Poor embryo quality on Day 2 (x-axis) as denoted by three groups of results to visually display the % of embryos of a given quality that progress from Day 2 to Day 3 (y-axis). Thus, each set of blue, red and green bars sum to 100, representing 100% of the proportion of embryos moving from Day 2 to Day 3. The impact of DNA damage is demonstrated by substratifying results by sperm DNA damage levels. None of these differences were found to be significant.

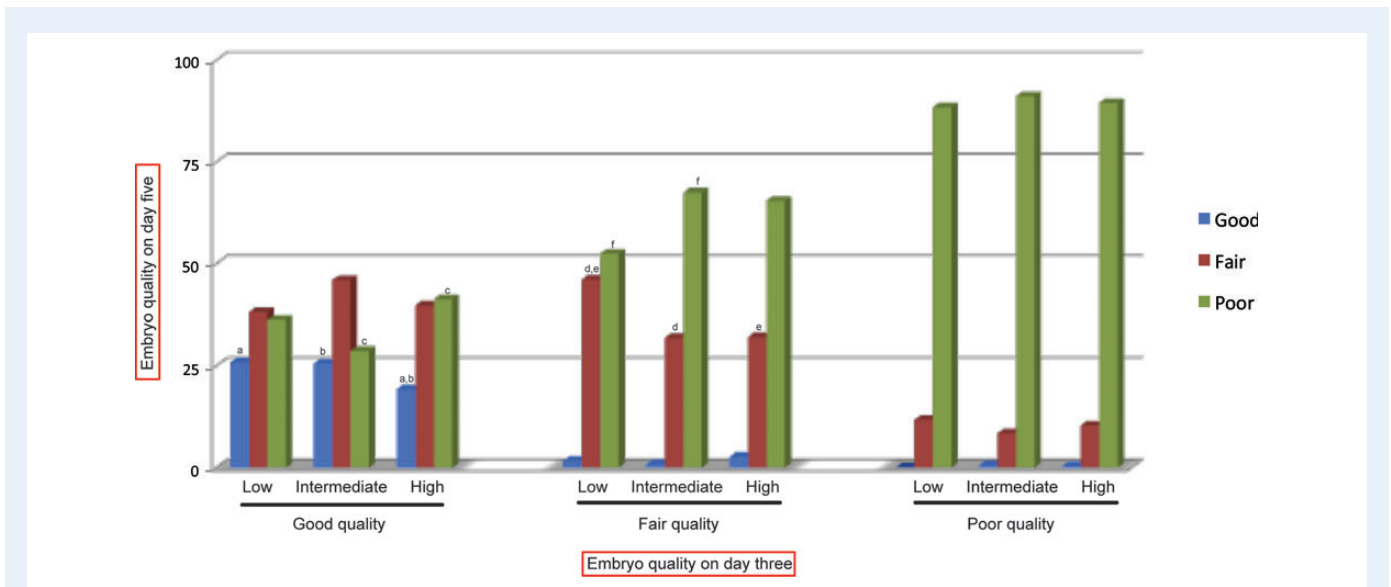

**Figure 3** Progression of human embryo development from Day 3 to Day 5 stratified by DNA damage levels (low, intermediate and high). Values expressed as percentage of embryo quality on Day 5 in each strata of DNA damage. Columns with similar letters are statistically significant  $P < 0.05$ . Results are stratified by Good, Fair and Poor embryo quality on Day 3 (x-axis) as denoted by three groups of results to visually display the percentage of embryos of a given quality that progress from Day 3 to Day 5 (y-axis). Thus, each set of blue, red and green bars sum to 100, representing 100% of the proportion of embryos moving from Day 3 to Day 5. The impact of DNA damage is demonstrated by substratifying results by sperm DNA damage levels.

## Discussion

This study associates the paternal effect of sperm DNA damage with early embryonic development through implantation in a cohort of 215 couples. Although, the paternal influence of damaged chromatin was

observed at all embryonic developmental stages, we found a more prominent paternal effect after embryonic genome activation had occurred. While the peri-fertilization stage showed a stronger maternal effect than a paternal influence, more significant differences in the quality of embryos with respect to sperm DNA damage were observed as

**Table IV Comparison between sperm DNA damage and implantation rate.**

|                            | Low       | Intermediate | High       | P-value |
|----------------------------|-----------|--------------|------------|---------|
| Implantation rate % (n)    | 65.0 (60) | 55.3 (114)   | 33.3 (123) | <0.001  |
| Female age ≤35 years % (n) | 60.4 (48) | 56.6 (83)    | 44.8 (87)  | <0.001  |
| Female age >35 years % (n) | 83.3 (12) | 51.6 (31)    | 5.6 (36)   | <0.001  |

The chi-square statistic was used to calculate the P-value. P-values compare the implantation rate between the sperm DNA damage categories.

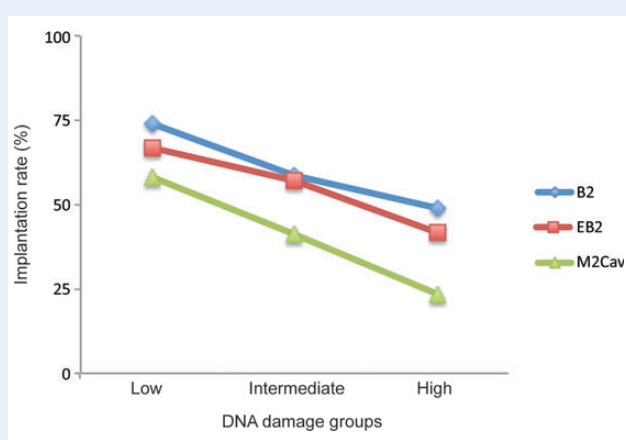

**Figure 4** Implantation rate for the three major types of human blastocyst transferred in the three DNA damage groups. Values expressed as a percentage. B2, blastocyst; EB2, early-stage blastocyst; M2Cav, cavitating morula.

embryos were cultured *in vitro* to later stages. Moreover, a strong paternal influence on implantation and pregnancy rates was observed following Day 5 transfers.

Failure to fertilize following ICSI may be related to defective sperm and/or oocyte. The quality of both oocytes and sperm has previously been associated with diminished fertilization (Nasr-Esfahani *et al.*, 2001, 2004, 2005; Emery *et al.*, 2005; Greco *et al.*, 2006; Neri *et al.*, 2013). In the present study, ~11% of the oocytes after ICSI did not fertilize normally. We did not observe any association between sperm DNA damage and a peri-fertilization defect. These results indicate that sperm with DNA fragmentation can undergo successful fertilization, pronuclear formation and syngamy. Fatehi *et al.* (2006) and Chen *et al.* (2012) showed experimentally that DNA damage induced in sperm by irradiation does not block fertilization. These studies are in agreement with our finding that sperm DNA damage has minimal effects at the pronuclear stages. We also observed that couples with female factor infertility had a higher incidence of pronuclear stage defect, which is consistent with a previous report (Navot *et al.*, 1991).

Development of the embryo post-fertilization depends on a reserve of maternal mRNA accumulated during oocyte growth and maturation

(Telford *et al.*, 1990). Previous studies have reported that significant transcription of the embryonic genome only takes place after the 4-cell stage in humans (Braude *et al.*, 1988). In our study, we observe a decrease (6%) in good quality embryos and an increase (8%) in the poor quality embryos between the low and high DNA damage groups on Day 2. Although the effect of sperm DNA damage is more apparent in later stages of embryogenesis, this small but significant effect observed during the first couple of embryonic cell divisions is not likely to be due to paternal gene expression abnormalities, as the embryonic genome is not yet activated. Harrouk *et al.* (2000) reported that paternal DNA damage might be translated into chromosome aberrations after the first metaphase. Consistent with this, our study supports an effect of sperm DNA damage during stages prior to embryonic genome activation. This novel finding is intriguing and highlights the need for further studies on the effects of DNA damage on chromatin remodeling post-fertilization.

We showed that on Day 3 and Day 5 of culture, there is a significant decrease in the percentage of good quality embryos and an increase in the percentage of poor quality embryos with increased sperm DNA damage. Fatehi *et al.* (2006) reported that when oocytes are fertilized with sperm containing induced DNA damage, embryonic development completely arrests after the second or third cleavage, and only sporadic blastocyst formation occurs. Jackson and Bartek (2009) reported that DNA damage can affect a wide variety of cellular processes, including DNA repair mechanisms, transcription and cell cycle control (Jackson and Bartek 2009). Thus, it is possible that extensive paternal DNA damage could affect these normal embryonic cell processes (Bordignon and Smith, 1999). While the oocyte can repair some damaged DNA (Bazrgar *et al.*, 2014), if the level of DNA damage exceeds the oocyte's capacity to completely repair the damage, then the cell might undergo apoptosis. In the male infertility group, we observed an increase in embryo quality with increased sperm DNA damage. This result was in contrast to female and unexplained infertility group and can likely be attributed to the very low sample size in this category; 3, 38 and 19 embryos in the low, intermediate and high DNA damage groups, respectively (Table I).

Here, for the first time, we show that the progression of development from good quality Day 3 embryos to blastocysts is highly influenced by the level of sperm DNA damage. It was previously observed that faster dividing cleavage stage embryos more often develop into blastocysts (McKiernan and Bavister, 1994; Lonergan *et al.*, 1999; Lee *et al.*, 2012; Knez *et al.*, 2013), and are associated with higher pregnancy rates (van Montfoort *et al.*, 2004). We speculate that sperm DNA damage levels are directly related to embryonic cleavage rates, such that the activation of additional DNA repair pathways forces delays in cell division (Su *et al.*, 2000; Wells *et al.*, 2005; Bazrgar *et al.*, 2014), resulting in a poor quality blastocyst (Ivec *et al.*, 2011). Because these differences in embryo quality are often not apparent before Day 5, our results suggest that patients with high sperm DNA damage could benefit from Day 5 blastocyst transfers, as opposed to Day 3 transfers.

In recent years, the high success rate achieved by ICSI has led some to suggest that ICSI should be performed for all ART cases (Fishel *et al.*, 2000; Oehninger and Gosden, 2002). Yoeli *et al.* (2008) reported that the embryo quality depends on intrinsic factors of the gametes, rather than the fertilization process. When we compared the development of embryos between the DNA damage groups after IVF and ICSI insemination, we observed a significant increase in the percentage of good quality embryos and decrease in the percentage of poor quality embryos in the



intermediate DNA damage groups after ICSI. We hypothesize that the selection of physiologically motile and morphologically normal sperm for ICSI insemination (Sakkas, 2013) increases the probability of picking sperm with low DNA damage. This hypothesis is supported by the fact that sperm DNA damage is negatively associated with both normal morphology (Said et al., 2005) and progressive motility (Simon and Lewis, 2011); however, this hypothesis merits further study.

Our results are in agreement with a number of studies demonstrating that low implantation and spontaneous miscarriages may involve a paternal effect (Carrell and Liu, 2003; Carrell et al., 2003; Virro et al., 2004; Hjollund et al., 2005; Slama et al., 2005; Simon et al., 2014). Here for the first time, we show that the paternal effect of sperm DNA damage is more prominent in the higher maternal age group. We hypothesize that in this group of patients, the oocyte's competence to repair could be a contributing factor for the observed lower implantation rate (Wang et al., 2009). It is established that transfer of good quality blastocysts results in higher pregnancy rates compared with early stage blastocysts and cavitating morula (Kovacic et al., 2004; Goto et al., 2011; van den Abbeel et al., 2013). We show that sperm DNA damage also has a negative impact on implantation of each blastocyst type. Importantly, these results suggest that patients with lower sperm DNA damage levels have a higher likelihood of implantation, and would benefit from single embryo transfer.

In this study, we used a Comet alkaline assay to quantify sperm DNA damage. A number of other studies have previously used alternative methods, including sperm chromatin dispersion assay (Muriel et al., 2006; Velez de la Calle et al., 2008; Rama Raju et al., 2012), terminal deoxynucleotidyl transferase (TUNEL) assay (Seli et al., 2004; Benchaib et al., 2007; Avendano et al., 2010), and sperm chromatin structure assay (Saleh et al., 2003; Virro et al., 2004; Check et al., 2005; Zini et al., 2005; Lazaros et al., 2013), to measure DNA damage in sperm and correlate the levels with embryo quality. Importantly, the Comet assay results confirm the findings using other assays that higher sperm DNA damage is associated with lower embryo quality, increased embryo development arrest and decreased pregnancy rates, while lower sperm DNA damage is associated with higher embryo quality, better embryo development and increased pregnancy rates (Seli et al., 2004; Virro et al., 2004; Benchaib et al., 2007; Velez de la Calle et al., 2008; Simon et al., 2011, 2014). Moreover, the results presented here agree with the conclusion put forth by Virro et al. (2004) that DNA fragmentation analysis can be utilized as a predictor for IVF/ICSI outcomes. These results are also supported by an *in vivo* study (Evenson et al., 1999) where DNA fragmentation correlates with fertility status, time to pregnancies and spontaneous miscarriages.

In conclusion, this study reveals a strong paternal effect of sperm DNA damage in all stages of early embryonic development following fertilization as well as pregnancy rates. Such a prolonged paternal effect may be due to chromosomal aberrations, defective cellular processes, delayed cell cleavage or a combination of these factors. If the paternal damage is beyond repair, the blastomeres may undergo apoptosis, leading to reduced embryo quality or embryonic arrest. Interestingly, our results show that ICSI-derived embryos are of better quality than IVF derived embryos when the sperm DNA damage is higher. Although the literature is conflicting, we propose that measurement of sperm DNA fragmentation has the potential to become an important prognostic tool for various natural conception and IVF practices. For patients with high sperm DNA damage, we recommend selection of physiologically

motile and morphologically normal sperm by ICSI for patients with a high percentage of sperm with DNA damage, Day 5 embryo transfer, and a possible justification for multiple embryo transfer. We conclude that the paternal effect of sperm DNA damage on embryonic development was significant, and we recommend additional studies with large sample size aimed at assessing DNA damage analysis as a diagnostic tool for IVF.

## Supplementary data

Supplementary data are available at <http://humrep.oxfordjournals.org/>.

## Acknowledgements

The authors thank the UCRM IVF unit and laboratory staff for their commitment and support to this project, for preparing tissue samples and helping to collect data on ART outcomes.

## Authors' roles

L.S. is a postdoctoral fellow and was responsible for performing sperm DNA damage assay, statistical analysis and writing the manuscript. K.M. was responsible for collecting ART data from patients enrolled in the study and writing the manuscript. M.B.S. and L.L. were responsible for collecting ART data from patients enrolled in the study. B.E. was responsible for consenting the study subjects and generating the figures for the manuscript. K.I.A. and J.H. contributed to the writing of the manuscript and analysis of results. D.T.C. is the principle investigator for this study and is responsible for design of the study. D.T.C. is the head of ART unit and is the corresponding author for this manuscript.

## Funding

No personal or direct financial support has been received for any of this work. There has been no contribution to study design, results analysis or writing of the manuscript from any funding source. Provision of laboratory and research staff, who have contributed to this work, has been supported by School of Medicine University of Utah.

## Conflict of interest

D.T.C. has received no personal financial support for this work. L.S. has no conflict of interest. K.M. has no conflict of interest. M.B.S. has no conflict of interest. L.L. has no conflict of interest. K.I.A. has no conflict of interest. B.E. has no conflict of interest. J.H. has no conflict of interest.

## References

- Ajduk A, Zernicka-Goetz M. Quality control of embryo development. *Mol Aspects Med* 2013;**34**:903–918.
- Avendano C, Franchi A, Duran H, Oehninger S. DNA fragmentation of normal spermatozoa negatively impacts embryo quality and intracytoplasmic sperm injection outcome. *Fertil Steril* 2010;**94**:549–557.
- Baltaci V, Satiroglu H, Kabukcu C, Unsal E, Aydinuraz B, Uner O, Aktas Y, Cetinkaya E, Turhan F, Aktan A. Relationship between ECS and aneuploidies. *Reprod Biomed Online* 2006;**12**:77–82.

- Bazrgar M, Gourabi H, Yazdi PE, Vazirinasab H, Fakhri M, Hassani F, Valojerdi MR. DNA repair signalling pathway genes are overexpressed in poor-quality pre-implantation human embryos with complex aneuploidy. *Eur J Obstet Gynecol Reprod Biol* 2014;**175**:152–156.
- Benchaib M, Lornage J, Mazoyer C, Lejeune H, Salle B, Guerin JF. Sperm deoxyribonucleic acid fragmentation as a prognostic indicator of assisted reproductive technology outcome. *Fertil Steril* 2007;**87**:93–101.
- Bordignon V, Smith LC. Ultraviolet-irradiated spermatozoa activate oocytes but arrest preimplantation development after fertilization and nuclear transplantation in cattle. *Biol Reprod* 1999;**61**:1513–1520.
- Braude P, Bolton V, Moore S. Human gene expression first occurs between the four- and eight-cell stages of preimplantation development. *Nature* 1988;**332**:459–461.
- Carrell DT. Epigenetics of the male gamete. *Fertil Steril* 2012;**97**:267–274.
- Carrell DT, Liu L. Sperm DNA fragmentation is increased in couples with unexplained recurrent pregnancy loss. *Arch Androl* 2003;**49**:49–55.
- Carrell DT, Peterson CM, Jones KP, Hatasaka HH, Udoff LC, Cornwell CE, Thorp C, Kuneck P, Erickson L, Campbell B. A simplified coculture system using homologous, attached cumulus tissue results in improved human embryo morphology and pregnancy rates during *in vitro* fertilization. *J Assist Reprod Genet* 1999;**16**:344–349.
- Carrell DT, Wilcox AL, Lowy L, Peterson CM, Jones KF, Erickson L, Campbell B, Branch DW, Hatasaka HH. Elevated sperm chromosome aneuploidy and apoptosis in patients with unexplained recurrent pregnancy loss. *Obstet Gynecol* 2003;**101**:1229–1235.
- Check JH, Graziano V, Cohen R, Krotec J, Check ML. Effect of an abnormal sperm chromatin structural assay (SCSA) on pregnancy outcome following (IVF) with ICSI in previous IVF failures. *Arch Androl* 2005;**51**:121–124.
- Chen H, Liao SB, Cheung MPL, Chow PH, Cheung ALM, Sum W. Effects of sperm DNA damage on the levels of RAD51 and p53 proteins in zygotes and 2-cell embryos sired by golden hamsters without the major accessory sex glands. *Free Radic Biol Med* 2012;**53**:885–892.
- Dar S, Grover SA, Moskovtsev SI, Swanson S, Baratz A, Librach CL. *In vitro* fertilization–intracytoplasmic sperm injection outcome in patients with a markedly high DNA fragmentation index (>50%). *Fertil Steril* 2013;**100**:75–80.
- Donnelly ET, McClure N, Lewis SE. The effect of ascorbate and alpha-tocopherol supplementation *in vitro* on DNA integrity and hydrogen peroxide-induced DNA damage in human spermatozoa. *Mutagenesis* 1999;**14**:505–512.
- Emery BR, Wilcox AL, Aoki VW, Peterson CM, Carrell DT. *In vitro* oocyte maturation and subsequent delayed fertilization is associated with increased embryo aneuploidy. *Fertil Steril* 2005;**84**:1027–1029.
- Evenson DP, Jost LK, Marshall D, Zinaman MJ, Clegg E, Purvis K, de Angelis P, Claussen OP. Utility of the sperm chromatin structure assay as a diagnostic and prognostic tool in the human fertility clinic. *Hum Reprod* 1999;**14**:1039–1049.
- Fatehi AN, Bevers MM, Schoevers E, Roelen BAJ, Colenbrander B, Gadella BM. DNA damage in bovine sperm does not block fertilization and early embryonic development but induces apoptosis after the first cleavages. *J Androl* 2006;**27**:176–188.
- Fishel S, Aslam I, Lisi F, Rinaldi L, Timson J, Jacobson M, Gobetz L, Green S, Campbell A, Lisi R. Should ICSI be the treatment of choice for all cases if in-vitro conception? *Hum Reprod* 2000;**15**:1278–1283.
- Goto S, Kadowaki T, Tanaka S, Hashimoto H, Koikeguchi S, Shiotani M. Prediction of pregnancy rate by blastocyst morphological score and age, based on 1,488 single frozen-thawed blastocyst transfer cycles. *Fertil Steril* 2011;**95**:948–952.
- Greco E, Ubaldi F, Rienzi L, Iacobelli M, Ferrero S, Minasi G, Romano S, Litwicka C, Tesarik J. Limiting the number of injected oocytes to three impairs ICSI outcomes in patients with nonobstructive azoospermia. *Hum Reprod* 2006;**21**:1521–1524.
- Harrouk W, Codrington A, Vinson R, Robaire B, Hales BF. Paternal exposure to cyclophosphamide induces DNA damage and alters the expression of DNA repair genes in the rat preimplantation embryo. *Mutat Res* 2000;**461**:229–241.
- Hjollund NH, Bonde JP, Ernst E, Lindenberg S, Andersen AN, Olsen J. Spontaneous abortion in IVF couples. A role of male welding exposure. *Hum Reprod* 2005;**20**:1793–1797.
- Hughes CM, Lewis SEM, McKelvey-Martin V, Thompson W. Reproducibility of human sperm DNA measurements using the alkaline single cell gel electrophoresis assay. *Mutat Res* 1997;**374**:261–268.
- Ivec M, Kovacic B, Vlasisavljevic V. Prediction of human blastocyst development from morulas with delayed and/or incomplete compaction. *Fertil Steril* 2011;**96**:1473–1478.
- Jackson SP, Bartek J. The DNA-damage response in human biology and disease. *Nature* 2009;**461**:1071–1078.
- Janny L, Menezo YJR. Evidence for a strong paternal effect on human preimplantation embryo development and blastocyst formation. *Mol Reprod Dev* 1994;**38**:36–42.
- Knez K, Tomazevic T, Vrtacnik-Bokal E, Virant-Klun I. Developmental dynamics of IMSI-derived embryos: a time-lapse prospective study. *Reprod Biomed Online* 2013;**27**:161–171.
- Kovacic B, Vlasisavljevic V, Reljic M, Cizek-Sajko M. Developmental capacity of different morphological types of day 5 human morulae and blastocysts. *Reprod Biomed Online* 2004;**8**:687–694.
- Lazaros L, Vartholomatos G, Pamporaki C, Kosmas I, Takenaka A, Makrydimas G, Sofikitis N, Stefanos T, Zikopoulos K, Hatzis E *et al*. Sperm flow cytometric parameters are associated with ICSI outcome. *RBM Online* 2013;**26**:611–618.
- Lee MJ, Lee RKK, Lin MH, Hwu YM. Cleavage speed and implantation potential of early-cleavage embryos in IVF or ICSI cycles. *J Assist Reprod Genet* 2012;**29**:745–750.
- Lonegan P, Khatir H, Piumi F. Effect of time interval from insemination to first cleavage on the developmental characteristics, sex and pregnancy rates following transfer of bovine preimplantation embryos. *J Reprod Fertil* 1999;**117**:159–167.
- Marteil G, Richard-Parpaillon L, Kubiak JZ. Role of oocyte quality in meiotic maturation and embryonic development. *Reprod Biol* 2009;**9**:203–224.
- McKiernan S, Bavister B. Timing of development is a critical parameter for predicting successful embryogenesis. *Hum Reprod* 1994;**9**:2123–2129.
- Muriel L, Garrido N, Fernández JL, Remohí J, Pellicer A, de los Santos MJ, Meseguer M. Value of the sperm DNA fragmentation level, measured by the sperm chromatin dispersion (SCD) test, in the IVF and ICSI outcome. *Fertil Steril* 2006;**85**:371–383.
- Nasr-Esfahani MH, Razavi S, Mardani M. Relation between different human sperm nuclear maturity tests and *in vitro* fertilization. *J Assist Reprod Genet* 2001;**18**:219–225.
- Nasr-Esfahani MH, Razavi S, Mozdarani H, Mardani M, Azvagi H. Relationship between protamine deficiency with fertilization rate and incidence of sperm premature chromosomal condensation post-ICSI. *Andrologia* 2004;**36**:95–100.
- Nasr-Esfahani MH, Salehi M, Razavi S, Anjomshoa M, Rozbahani S, Moulavi F, Mardani M. Effect of sperm DNA damage and sperm protamine deficiency on fertilization and embryo development post-ICSI. *Reprod Biomed Online* 2005;**11**:198–205.
- Navot D, Bergh RA, Williams MA, Garrisi GJ, Guzman I, Sandler B, Grunfeld L. Poor oocyte quality rather than implantation failure as a cause of age-related decline in female fertility. *Lancet* 1991;**337**:1375–1377.
- Neri QV, Leea B, Rosenwaksa Z, Machacab K, Palermo GD. Understanding fertilization through intracytoplasmic sperm injection (ICSI). *Cell Calcium* 2013;**55**:24–37.
- Nijs M, Creemers E, Cox A, Franssen K, Janssen M, Vanheusden E, de Jonge C, Ombelet W. Chromomycin A3 staining, sperm chromatin

- structure assay and hyaluronic acid binding assay as predictors for assisted reproductive outcome. *Reprod Biomed Online* 2009;**19**:671–684.
- Oehninger S, Gosden RG. Should ICSI be the treatment of choice for all cases of in-vitro conception? No, not in light of the scientific data. *Hum Reprod* 2002;**17**:2237–2242.
- Ozmen B, Koutlaki N, Youssry M, Diedrich K, Al-Hasani S. DNA damage of human spermatozoa in assisted reproduction: origins, diagnosis, impacts and safety. *Reprod Biomed Online* 2007;**14**:384–395.
- Parinaud J, Mieusset R, Vieitez G, Labal B, Richoille G. Influence of sperm parameters on embryo quality. *Fertil Steril* 1993;**60**:888–892.
- Rama Raju GA, Prakash GJ, Krishna KM, Madan K, Narayana TS, Krishna CHR. Noninsulin-dependent diabetes mellitus: effects on sperm morphological and functional characteristics, nuclear DNA integrity and outcome of assisted reproductive technique. *Andrologia*, 2012;**44**:490–498.
- Ron-El R, Nachum H, Herman A, Golan A, Caspi E, Soffer Y. Delayed fertilization and poor embryonic development associated with impaired semen quality. *Fertil Steril* 1991;**55**:338–344.
- Said TM, Agarwal A, Sharma RK, Thomas AJ, Sikka SC. Impact of sperm morphology on DNA damage caused by oxidative stress induced by beta-nicotinamide adenine dinucleotide phosphate. *Fertil Steril* 2005;**83**:95–103.
- Sakkas D. Novel technologies for selecting the best sperm for *in vitro* fertilization and intracytoplasmic sperm injection. *Fertil Steril* 2013;**99**:1023–1029.
- Saleh RA, Agarwal A, Nada EA, El-Tonsy MH, Sharma RK, Meyer A, Nelson DR, Thomas AJ. Negative effects of increased sperm DNA damage in relation to seminal oxidative stress in men with idiopathic and male factor infertility. *Fertil Steril* 2003;**79**:1597–1606.
- Scott L. Pronuclear scoring as a predictor of embryo development. *Reprod Biomed Online* 2003;**6**:201–214.
- Seli E, Gardner DK, Schoolcraft WB, Moffatt O, Sakkas D. Extent of nuclear DNA damage in ejaculated spermatozoa impacts on blastocyst development after *in vitro* fertilization. *Fertil Steril* 2004;**82**:378–383.
- Simon L, Lewis SEM. Sperm DNA damage or progressive motility: which one is the better predictor of fertilization rates *in vitro*? *Syst Biol Reprod Med* 2011;**57**:133–138.
- Simon L, Brunborg G, Stevenson M, Lutton D, McManus J, Lewis SEM. Clinical significance of sperm DNA damage in assisted reproductive outcome. *Hum Reprod* 2010;**25**:1594–1608.
- Simon L, Lutton D, McManus J, Lewis SEM. Sperm DNA damage measured by the alkaline Comet assay as an independent predictor of male infertility and IVF success. *Fertil Steril* 2011;**95**:652–657.
- Simon L, Liu L, Murphy K, Ge S, Hotaling J, Aston KI, Emery B, Carrell DT. Comparative analysis of three sperm DNA damage assays and sperm nuclear protein content in couples undergoing assisted reproduction treatment. *Hum Reprod* 2014;**29**:904–917.
- Slama R, Bouyer J, Windham G, Fenster L, Werwatz A, Swan SH. Influence of paternal age on the risk of spontaneous abortion. *Am J Epidemiol* 2005;**161**:816–823.
- Su TT, Walker J, Stumpff J. Activating the DNA damage checkpoint in a developmental context. *Curr Biol* 2000;**10**:119–126.
- Tavalaee M, Razavi S, Nasr-Esfahani MH. Influence of sperm chromatin anomalies on assisted reproductive technology outcome. *Fertil Steril* 2009;**91**:1119–1126.
- Telford NA, Watson AJ, Schultz GA. Transition from maternal to embryonic control in early mammalian development: a comparison of several species. *Mol Reprod Dev* 1990;**26**:90–100.
- Terriou P, Giorgetti C, Hans E, Salzmann J, Charles O, Cignetti L, Avon C, Roulier R. Relationship between even early cleavage and day 2 embryo score and assessment of their predictive value for pregnancy. *Reprod Biomed Online* 2007;**14**:294–299.
- Tesarik J, Greco E, Mendoza C. Late, but not early, paternal effect on human embryo development is related to sperm DNA fragmentation. *Hum Reprod* 2004;**19**:611–615.
- van den Abbeel E, Balaban B, Ziebe S, Lundin K, Cuesta MJG, Klein BM, Helmgard L, Arce JC. Association between blastocyst morphology and outcome of single-blastocyst transfer. *Reprod Biomed Online* 2013;**27**:353–361.
- van Montfoort A, Dumoulin J, Kester A, Evers J. Early cleavage is a valuable addition to existing embryo selection parameters: a study using single embryo transfers. *Hum Reprod* 2004;**19**:2103–2108.
- Velez de la Calle JFV, Muller A, Walschaerts M, Clavere JL, Jimenez C, Wittemer C, Thonneau P. Sperm deoxyribonucleic acid fragmentation as assessed by the sperm chromatin dispersion test in assisted reproductive technology programs: results of a large prospective multicenter study. *Fertil Steril* 2008;**90**:1792–1799.
- Virro MR, Larson-Cook KL, Evenson DP. Sperm chromatin structure assay (SCSA) parameters are related to fertilization, blastocyst development, and ongoing pregnancy in *in vitro* fertilization and intracytoplasmic sperm injection cycles. *Fertil Steril* 2004;**81**:1289–1295.
- Wang LY, Wang DH, Zou XY, Xu CM. Mitochondrial functions on oocytes and preimplantation embryos. *J Zhejiang Univ Sci B* 2009;**10**:483–492.
- Wells D, Bermudez MG, Steuerwald N, Thornhill AR, Walker DL, Malter H, Delhanty JD, Cohen J. Expression of genes regulating chromosome segregation, the cell cycle and apoptosis during human preimplantation development. *Hum Reprod* 2005;**20**:1339–1348.
- World Health Organization. *WHO Laboratory Manual for the Examination of Human Semen and Sperm-Cervical Mucus Interaction*, 4th edn. Cambridge, UK: Cambridge University Press, 1999.
- Yoeli R, Orvieto R, Ashkenazi J, Shelef M, Ben-Rafael Z, Bar-Hava I. Comparison of embryo quality between intracytoplasmic sperm injection and *in vitro* fertilization in sibling oocytes. *J Assist Reprod Genet* 2008;**25**:23–28.
- Zini A, Meriano J, Kader K, Jarvi K, Laskin CA, Cadesky K. Potential adverse effect of sperm DNA damage on embryo quality after ICSI. *Hum Reprod* 2005;**20**:3476–3480.
